# Supplementary material for: Effect and acceptability of an mHealth smoking cessation intervention ‘Stopcoach’ combined with smoking cessation counseling for people from multiple levels of socioeconomic position: a multi-methods study
Source: Springer Nature journal article supplement (doi:10.1186/s13011-025-00651-z), 2025-05-28
Supplement: MOESM1 [file 13011_2025_651_MOESM1_ESM.pdf]

## Interview Protocol SCC Trainers

*Translated from Dutch*

1. Introduction, overview of the study, informed consent
  - a. Thank you very much for participating in this interview by phone. We would like to know how you experienced smartphone app the Stopcoach. The interview will take around 20 minutes. After completing the interview, you will receive a gift card worth 35,- for your cooperation.
  - b. Before we start I will have to go over a few things. This phone call will be recorded. All information you provide will be used confidentially in scientific research. In no way will any data be traceable to you as individual. This information has also been sent to you by mail.
    - i. Did you receive this information?
    - ii. Do you have any questions about this information?
    - iii. Did you understand everything and do you agree?
2. Background
  - a. What is your birthyear?
  - b. How long have you worked for SineFuma?
  - c. How many SSC sessions have you given, approximately?
  - d. What education did you have?
  - e. Have you ever smoked yourself?
  - f. Have you ever used any other health apps?
    - i. If yes: What was your experience?
    - ii. If no: Is there a reason for never using a health app?
3. Evaluation the Stopcoach
  - a. How did you get to know the Stopcoach? What have you undertaken to learn how the app works?
  - b. In what way did you offer the app to SCC participants? What role did the Stopcoach play in your SSC training sessions?
  - c. How did participants react to the Stopcoach? What did they find positive or negative about the app? Why?
  - d. How appropriate is the Stopcoach for smokers with low literacy or lower social economic position? Why?
  - e. What factors helped you use the Stopcoach?
    - i. Were there any aspects of the app that helped smokers? Why?
    - ii. What participants made better use of the app than others? Why?
    - iii. What factors in the context of SCC made the app more usable? Why?
    - iv. What factors of you as trainers made the app more usable in SCC? Why?
    - v. Were there any other factors influencing the use of the Stopcoach?
  - f. What were barriers in the use of the Stopcoach?
    - i. What factors of the app formed a barrier? Why?
    - ii. What participants were less likely to use the app? Why? How did you deal with this?
    - iii. What factors in the context of SCC were barriers for using the Stopcoach? Why? How did you deal with this?
    - iv. What factors of you as trainers were a barrier for using the Stopcoach? Why? How did you deal with this?
    - v. What other factors formed barriers for using the Stopcoach?

- g. Can the Stopcoach add anything to the SCC from SineFuma? If yes; what?
  - i. Do you have any ideas of how to improve the app? What are those ideas?
- h. What do you think is needed in the Stopcoach for it to be implemented nationally?

#### Conclusion

- Thank you for your participation in this interview. Is there anything you would like to tell us at this point?
